# Supplementary material
Source: publisher figshare collection journal article supplement (https://karger.figshare.com/ndownloader/files/11221484)
Supplement: Supplementary file 1 [file 11221484]

Table 1: Pathology confirmed by Endoscopy in BMT and TMT patients.

| **Therapy** | **Pathology confirmed by ENDa** | | |
| --- | --- | --- | --- |
| **No % (n)** | **Yes % (n)** | **Total** |
| **BMT** | | 18.8 (n=16) | | --- | |  | | | 81.2 (n=69) | | --- | |  | | | 85 | | --- | |  | |
| **TMT** | | 55.6 (n=20) | | --- | | | 44.4 (n=16) | | --- | |  | | | 36 | | --- | |  | |
| **Total** | | 36 | | --- | | | 85 | | --- | | | 121 | | --- | |

aEND= endoscopy
